# Supplementary material
Source: Springer Nature journal article supplement (https://www.springermedizin.de/resource/supplementary/12963_2004_36_MOESM1_ESM.pdf/9572532)

## Males

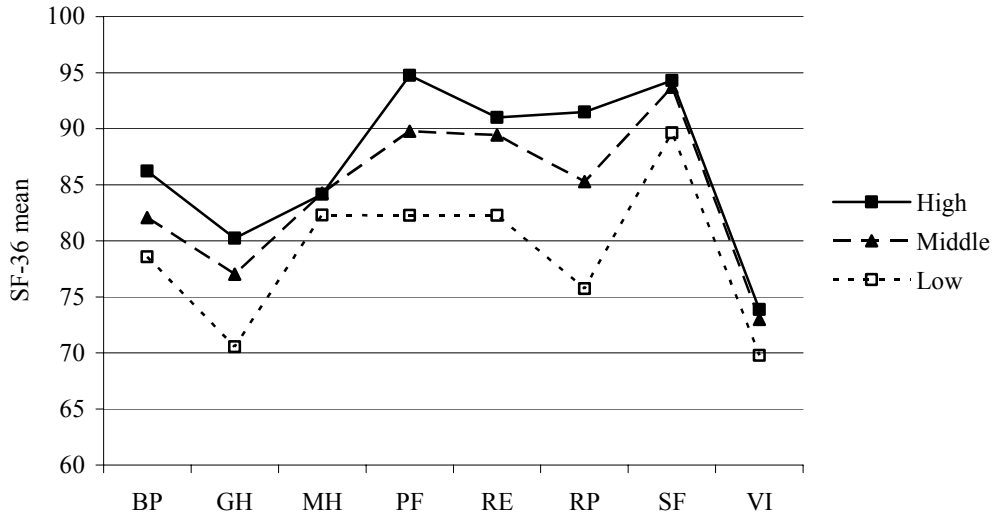

## Females

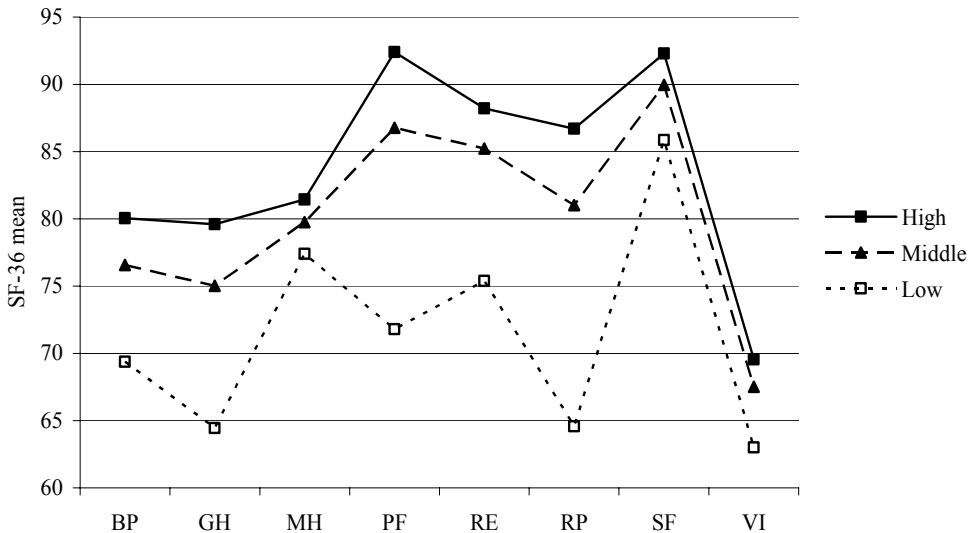

Supplement: MOESM1 [file 9572532]
